# Supplementary material for: Molecular dynamics study of the pore formation in single layer graphene oxide by a thermal reduction process
Source: Royal Society of Chemistry journal article supplement (doi:10.1039/d1cp00134e), 2021-01-01
Supplement: d1cp00134e1.pdf [file d1cp00134e1.pdf]

Supporting Information for:  
Molecular Dynamics Study of the Pore Formation in  
Single Layer Graphene Oxide by Thermal Reducing  
Process

Federico Raffone<sup>a,\*</sup>, Filippo Savazzi<sup>b</sup>, Giancarlo Cicero<sup>b</sup>

<sup>a</sup>*Department of Chemistry, Imperial College London, White City Campus, 80 Wood Lane, London W12 0BZ, United Kingdom*

<sup>b</sup>*Dipartimento di Scienza Applicata e Tecnologia, Politecnico di Torino, Corso Duca degli Abruzzi 24, Torino 10129, Italy*

---

---

## 1. *Ab initio* molecular dynamics

To verify the accuracy of ReaxFF MD trajectories, hence the applicability of such a force field to model the breaking and formation of bonds in GO at high temperatures, we compared classical results with accurate *ab initio* MD simulations. We considered one low-coverage ( $\theta = 10\%$ ) GO structure, containing only epoxides on the same side of the basal plane, in packed configuration. This sample, with a supercell of  $\sim 17 \times 17 \text{ \AA}$  and a  $12\text{\AA}$ -thick vertical vacuum layer between periodic replicas, is smaller than the structures investigated classically due to a much higher computational cost of first principle techniques. These dimensions although, are typical of GO models investigated by mean of DFT [1] [2] [3] and were shown to provide reliable results, with negligible self-interaction between periodic replicas. We only compared results at  $2500\text{K}$  to reduce the simulation time of the test, being desorption events faster at higher temperatures. We performed accurate Car-Parrinello Molecular Dynamics (CPMD) simulations using cp.x code within the Quantum Espresso 6.3 suite [4]. Electron exchange and correlation

---

\*Corresponding author

*Email address:* f.raffone@imperial.ac.uk (Federico Raffone)

were approximated using the PBE functional [5], with core-electrons potential replaced by ultrasoft pseudopotentials. Electronic wavefunctions were approximated by planewaves expansion up to a converged energy cutoff of  $36Ry$ . After initial system setup and electronic energy minimization, CPMD was performed using an electron fictitious mass  $\mu = 200a.u.$  and a timestep  $dt = 6a.u.$  for Verlet integration of the equations of motion. As with classical dynamics we increased the temperature of our system gradually, from  $\sim 0K$  to  $2500K$  in  $\sim 4ps$ . When the system reached thermal equilibrium we performed  $16ps$  of microcanonical (NVE) MD during which we collected data for trajectory analysis. Although temperature control was not applied during these  $16ps$ , the system temperature remained stable  $\sim 2500K$  as set initially. The evolution of this sample during this *ab initio* thermal treatment is close to that of similar GO structures treated classically. In particular, from our low-coverage sample containing only epoxide groups, we detected the desorption of 2  $CO$  molecules and 1  $CO_2$  molecule, in close agreement with results reported in Figure 1 of the main manuscript. Snapshots showing the desorption of  $CO$  and  $CO_2$  are reported in Figure S1. We did not observe any  $O_2$  desorption, probably due to the low coverage of the sample and the short simulation time.

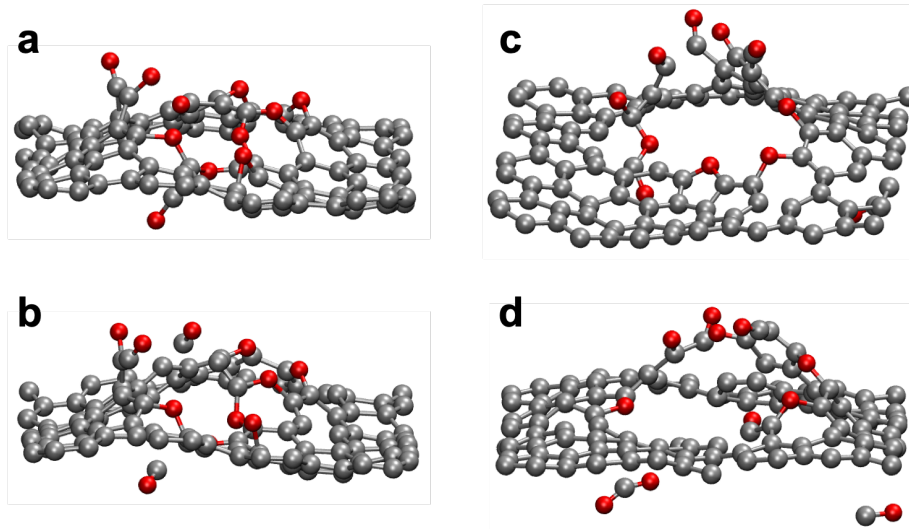

Figure S1: Snapshots showing the desorption of  $CO$  and  $CO_2$  from GO during thermal treatment at  $2500K$ . Snapshots *a* and *b* show the desorption of  $CO$ , while snapshots *c* and *d* show the desorption of  $CO_2$ .

## 2. Temperature cycle

The temperature cycle used in the molecular dynamics simulations, representative of a harsh reducing process, is shown in Figure S2. The target temperature indicated in the graph is either 1000 K, 1500 K or 2500 K.

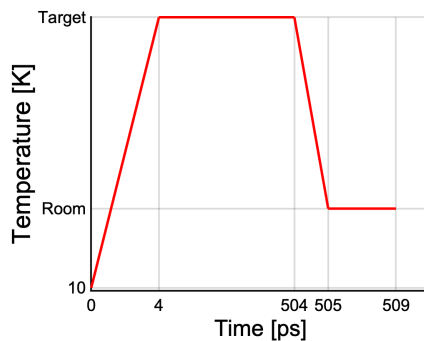

Figure S2: Simulation of the harsh reducing process. Applied temperature over time.

## 3. Epoxides distributed on different sides of graphene

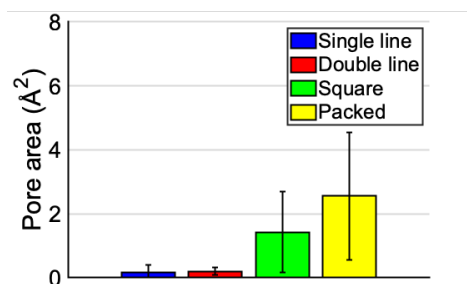

Figure S3: Final pore area of the GO cluster illustrated in Figure 3a of the main manuscript having the epoxide functional groups distributed on different sides of the basal plane.

We, here, show how the presence of epoxides on both sides of the basal plane of graphene can affect the final pore area. The calculation was performed on the same structures depicted in Figure 3a of the main manuscript but with epoxide alternated between top and bottom position on the sheet. The final pore area data, shown in Figure S3, are consistent with the ones

obtained for pores having epoxides on the same side. Linear clusters do not lead to the formation of pores suited for salt filtration whereas more circular ones are the most effective, with the packed configuration giving the best results. In Figure S4, the number and types of species that desorb during a harsh temperature process is indicated for both sheets with epoxides on the same side and on different sides. The trend is similar in both cases. In general, CO is the main molecule that desorbs and that causes carbon removal.

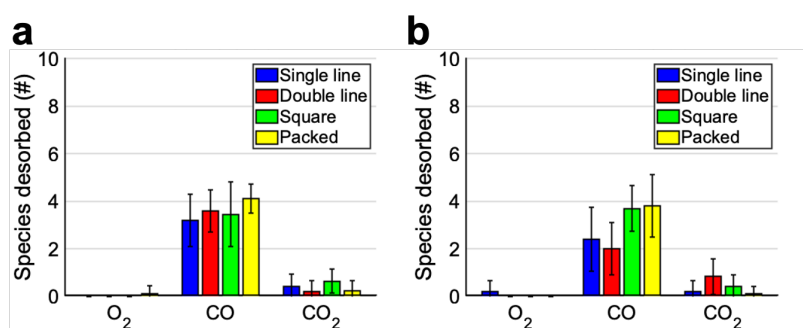

Figure S4: Number and types of species desorbed for sheets with epoxides on the same side (a) and on different sides (b) of the graphene sheet.

## References

- [1] F. Savazzi, F. Risplendi, G. Mallia, N. M. Harrison, G. Cicero, Unravelling some of the structure–property relationships in graphene oxide at low degree of oxidation, *J. Phys. Chem. Lett.* 9 (2018) 1746–1749.
- [2] S. Zhou, A. Bongiorno, Origin of the chemical and kinetic stability of graphene oxide, *Sci. Rep.* 3 (2013) 2484.
- [3] R. Larciprete, S. Fabris, T. Sun, P. Lacovig, A. Baraldi, S. Lizzit, Dual path mechanism in the thermal reduction of graphene oxide, *J. Am. Chem. Soc.* 133 (2011) 17315–17321.
- [4] P. Giannozzi, S. Baroni, N. Bonini, M. Calandra, R. Car, C. Cavazzoni, et al., Quantum espresso: a modular and open-source software project for quantum simulations of materials, *J. Phys. Condens. Mat.* 21 (2009) 395502.

- [5] K. B. J. P. Perdew, M. Ernzerhof, Generalized gradient approximation made simple, Phys. Rev. Lett. 77 (1996) 3865.
